# Supplementary material for: Radiation-Induced Esophagitis in Non-Small-Cell Lung Cancer Patients: Voxel-Based Analysis and NTCP Modeling
Source: MDPI journal article supplement (doi:10.3390/cancers14071833), 2022-04-05

Supplementary materials to

**Radiation induced esophagitis in non-small cell lung cancer patients: voxel-based analysis and NTCP modeling.**

Monti S. *et al.*

**Table S1. Patient and treatment characteristics for the full cohort and for the analyzed one.**

| <b>Characteristics</b>              | <b>Full cohort (n=202)</b> | <b>Patients with complete CT&amp;dose info<br/>(n= 173)</b> |
|-------------------------------------|----------------------------|-------------------------------------------------------------|
| <b><i>Continuous variables</i></b>  | <b>Median (range)</b>      | <b>Median (range)</b>                                       |
| Age at RT (yr)                      | 66 (33-85)                 | 66 (33-85)                                                  |
| Weight (Kg)                         | 78.8 (47.0-153.0)          | 79.3 (47.0-131.0)                                           |
| KPS baseline                        | 80 (60-100)                | 80 (60-100)                                                 |
| <b><i>Categorical variables</i></b> | <b>N (%)</b>               | <b>N (%)</b>                                                |
| Gender                              |                            |                                                             |
| Female                              | 92 (45)                    | 77 (44)                                                     |
| Male                                | 110 (55)                   | 96 (56)                                                     |
| Smoker                              |                            |                                                             |
| No                                  | 17 (8)                     | 15 (9)                                                      |
| Yes                                 | 185 (92)                   | 158 (91)                                                    |
| Chemotherapy                        |                            |                                                             |
| Induction                           |                            |                                                             |
| No                                  | 130 (64)                   | 116 (67)                                                    |
| Yes                                 | 72 (36)                    | 57 (33)                                                     |
| Adjuvant                            |                            |                                                             |
| No                                  | 157 (77)                   | 132 (76)                                                    |
| Yes                                 | 44 (22)                    | 40 (23)                                                     |
| Missing                             | 1 (1)                      | 1 (1)                                                       |
| RT modality                         |                            |                                                             |
| IMRT                                | 127 (63)                   | 109 (63)                                                    |
| PSPT                                | 75 (37)                    | 64 (37)                                                     |
| Prescription dose                   |                            |                                                             |
| 66 Gy                               | 78 (39)                    | 68 (39)                                                     |
| 74 Gy                               | 124 (61)                   | 105 (61)                                                    |
| Tumor Histology                     |                            |                                                             |
| Adenocarcinoma                      | 107 (53)                   | 89 (51)                                                     |
| Squamous cell carcinoma             | 69 (34)                    | 58 (34)                                                     |
| NSC NOS                             | 19 (9)                     | 19 (11)                                                     |
| Large Cell                          | 3 (2)                      | 3 (2)                                                       |
| Unknown                             | 4 (2)                      | 4 (2)                                                       |
| Tumor localization                  |                            |                                                             |
| Left lung                           | 70 (35)                    | 64 (37)                                                     |
| Right lung                          | 119 (59)                   | 109 (63)                                                    |
| Lower/middle lobe                   | 60 (30)                    | 53 (30)                                                     |
| Upper lobe                          | 129 (66)                   | 109 (67)                                                    |

**Abbreviations.** RT: Radiation Therapy, GTV: Gross Tumor Volume; KPS: Karnofsky Performance Status; IMRT: intensity modulated radiation therapy; PSPT: passive scattering proton therapy, NSC NOS: non-small-cell not otherwise specified

**Figure S1.** Cumulative risk of radiation-induced esophagitis (RE) stratified by (a) induction chemotherapy (CHT) and by treatment modality (intensity modulated radiation therapy – IMRT, and passively scattering proton therapy – PSPT).

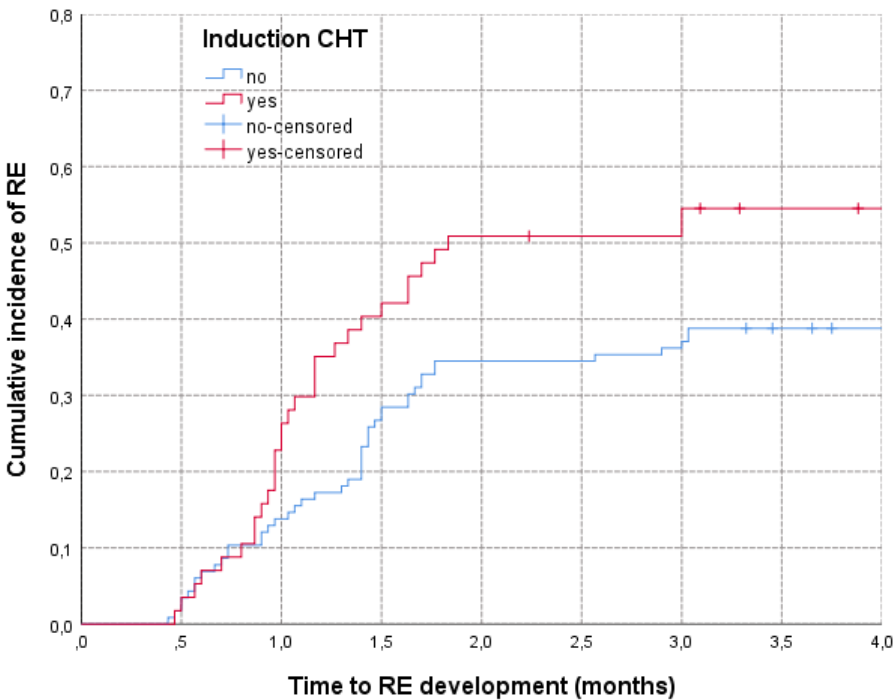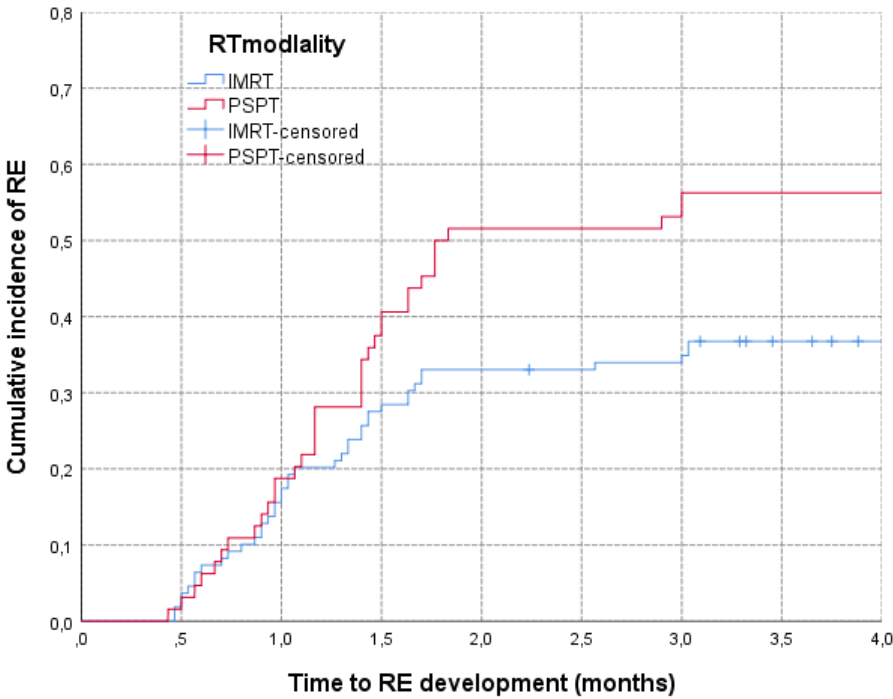

**Figure S2.** Sagittal computed tomography (CT) views fused with voxel-wise mean of biologically effective dose (BED, in Gy) in patients without (a) and with radiation-induced esophagitis (b)

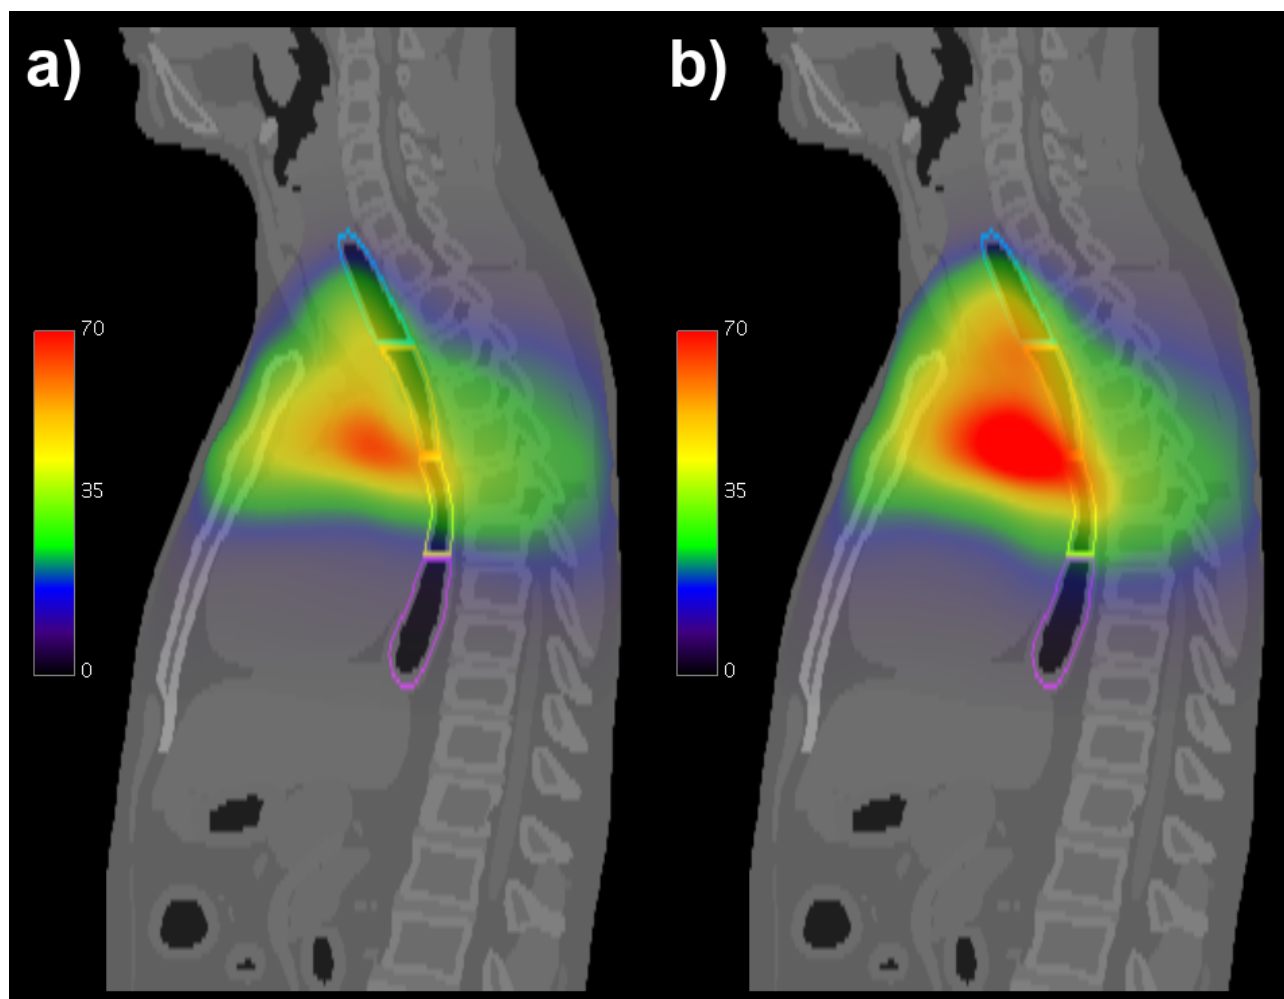

Supplement: s1 [file s1]
